# Supplementary material for: Vertical-displacement history of an active Basin and Range fault based on integration of geomorphologic, stratigraphic, and structural data
Source: Oxford University Press journal article supplement (doi:10.1130/ges01600.1), 2018-05-30
Supplement: ges01600_suppinfo.zip [file ges01600_suppinfo.zip]

Archive with 2 entries (2 files):
- Supporting_information_file_S2.xlsx
- Supporting_Information_file_S1.pdf
